# Supplementary material for: How to Tailor Porous Boron Nitride Properties for Applications in Interfacial Processes
Source: PubMed Central journal article supplement (PMC9972479; doi:10.1021/accountsmr.2c00148), 2023-01-30
Supplement: mr2c00148_si_001.pdf [file mr2c00148_si_001.pdf]

## Supporting Information

### How to tailor porous boron nitride properties for applications in interfacial processes

*Ioanna Itskou,<sup>1,¶</sup> Anouk L'Hermitte,<sup>1,2,¶</sup> Sofia Marchesini,<sup>3,¶</sup> Tian Tian,<sup>1,¶</sup> Camille Petit<sup>1\*</sup>*

<sup>1</sup> Barrer Centre, Department of Chemical Engineering, Imperial College London, London SW7  
2AZ, United Kingdom

<sup>2</sup> Department of Materials, Imperial College London, London SW7 2AZ, United Kingdom

<sup>3</sup> National Physical Laboratory, Hampton Road, Teddington, TW11 0LW, United Kingdom

¶ Authors contributed equally to the work.

\*Corresponding author: [camille.petit@imperial.ac.uk](mailto:camille.petit@imperial.ac.uk)

**Table S1.** Summary of studies relating to doping of porous boron nitride (BN) presented in Table 1.

| <b>Dopant</b> | <b>BN structure</b> | <b>Dopant content</b>                            | <b>Dopant chemical environment</b> | <b>Dopant role in the study</b>                            | <b>Nature of the study</b>     | <b>Ref.</b>   |
|---------------|---------------------|--------------------------------------------------|------------------------------------|------------------------------------------------------------|--------------------------------|---------------|
| C             | Porous BN           | 5 - 20 wt% C                                     | Within basal planes                | Reduction of bandgap                                       | Experimental                   | <sup>1</sup>  |
| C             | Porous BN           | 10 -12 wt% C                                     | Within basal planes                | Addition of sorption sites                                 | Experimental                   | <sup>2</sup>  |
| C             | BN nanosheets       | 8 - 15 wt% C                                     | Within basal planes                | Addition of sorption sites<br>Reduction of bandgap         | Experimental                   | <sup>3</sup>  |
| C             | BN nanosheets       | Approx. 6 - 9 at% C                              | Within basal planes                | Addition of active catalytic sites<br>Reduction of bandgap | Experimental                   | <sup>4</sup>  |
| C             | BN nanosheets       | 14 - 23 at% C                                    | Within basal planes                | Addition of sorption sites                                 | Computational + Experimental   | <sup>5</sup>  |
| O             | BN nanosheets       | 5 - 20 at% O                                     | Within basal planes<br>On edges    | Reduction of bandgap<br>Tuning of magnetic properties      | Computational+<br>Experimental | <sup>6</sup>  |
| O             | Porous BN           | -                                                | Within basal planes                | Tuning of magnetic properties                              | Computational + Experimental   | <sup>7</sup>  |
| O             | Porous BN           | Only at% of B and N atoms included               | Within basal planes                | Reduction of bandgap                                       | Experimental                   | <sup>8</sup>  |
| C, O          | Porous BN           | 8 at% C<br>6 at% O                               | Within basal planes                | Increase in specific surface area and adsorption capacity  | Experimental                   | <sup>9</sup>  |
| Si            | BN nanotubes        | -                                                | Within basal planes                | New synthesis technique                                    | Experimental                   | <sup>10</sup> |
| Si            | BN nanotubes        | 0.08 at% Si experimental, 5 at% Si computational | Within basal planes                | Reduction of bandgap                                       | Computational+<br>Experimental | <sup>11</sup> |
| P             | Porous BN           | 1 - 5 wt% P                                      | Within basal planes                | Addition of sorption sites                                 | Experimental                   | <sup>12</sup> |
| S             | h-BN                | -                                                | Within basal planes                | Reduction of bandgap                                       | Computational                  | <sup>13</sup> |
| S             | h-BN                | -                                                | Within basal planes                | Reduction in electrical resistivity                        | Experimental                   | <sup>14</sup> |
| F, C, O       | Porous BN           | -                                                | Within basal planes                | Reduction of bandgap                                       | Computational                  | <sup>15</sup> |

|                                                           |                |              |                                 |                                                                                               |               |    |
|-----------------------------------------------------------|----------------|--------------|---------------------------------|-----------------------------------------------------------------------------------------------|---------------|----|
|                                                           |                |              |                                 | Addition of sorption and catalytic sites                                                      |               |    |
| P, S, O, F, Cl                                            | h-BN monolayer | -            | Within basal planes             | Different reduction of bandgap depending on dopant                                            | Computational | 16 |
| Cu                                                        | BN nanobelts   | 1 - 4 wt% Cu | Within basal planes             | Creation of electric field within material<br>Electron transfer between reactant and Cu sites | Experimental  | 17 |
| Sc, Ti, V, Cr, Mn, Fe, Co, Ni, Cu, Zn, Mo, Ru, Rh, Pd, Ag | h-BN monolayer | -            | On monolayer surface            | Reduction of reaction limiting potential                                                      | Computational | 18 |
| Pt, Pd, Au, Ag                                            | BN monolayer   | -            | Within and on monolayer surface | Reduction of bandgap<br>Tuning of magnetic properties                                         | Computational | 19 |
| Au                                                        | Porous BN      | -            | Composite form                  | Introduction of plasmonic heating                                                             | Experimental  | 20 |

**Table S2.** Summary of bottom-up methods to produce shaped porous BN along with the material properties.

| Materials     | Precursors                                  | Reaction conditions                         | S <sub>BET</sub><br>[m <sup>2</sup> g <sup>-1</sup> ] | ρ <sup>a</sup><br>[mg cm <sup>-3</sup> ] | Ref.             |
|---------------|---------------------------------------------|---------------------------------------------|-------------------------------------------------------|------------------------------------------|------------------|
| BN aerogel    | Graphene, boron oxide                       | 1600-1800 °C (N <sub>2</sub> )              | 440                                                   | 60                                       | <sup>21,22</sup> |
| BN aerogel    | Graphene/carbon nanotube, borazine          | 900 °C (Ar/H <sub>2</sub> ); etching 600 °C | 180-1450                                              | 0.6-4.6                                  | <sup>23</sup>    |
| BN aerogel    | Graphene aerogel, borazine                  | 1500 °C (Ar); etching 600 °C                | 1080                                                  | 0.1                                      | <sup>24</sup>    |
| BN aerogel    | Graphene oxide/carbon nanotube, boron oxide | 1600 °C (N <sub>2</sub> )                   | 720                                                   | N/A                                      | <sup>25</sup>    |
| BN aerogel    | N-doped graphite, boron oxide               | 1700 °C (N <sub>2</sub> )                   | 170                                                   | 30.4                                     | <sup>26</sup>    |
| BN aerogel    | Polymeric aerogel, boric acid               | 1000-1200 °C (NH <sub>3</sub> )             | 1150-1410                                             | 180                                      | <sup>27</sup>    |
| BN aerogel    | M·2B aerogel                                | 1100 °C (NH <sub>3</sub> )                  | 780                                                   | 15                                       | <sup>28</sup>    |
| BN aerogel    | M·2B aerogel                                | 1200 °C (NH <sub>3</sub> )                  | 920                                                   | 15.5                                     | <sup>29</sup>    |
| BN aerogel    | M·2B aerogel                                | 1400 °C (Ar)                                | 990                                                   | 86.4                                     | <sup>30</sup>    |
| BN aerogel    | M·2B pellet                                 | 900-1350 °C (N <sub>2</sub> )               | 720-1030                                              | 154                                      | <sup>31</sup>    |
| BN aerogel    | BNNS, 1,4-butanediol diglycidyl ether       | RT aqueous reaction (24 h)                  | N/A                                                   | 10.4-30                                  | <sup>32</sup>    |
| BN aerogel    | BNNS, urea                                  | RT aqueous reaction (1 week)                | 280                                                   | 1.4-20                                   | <sup>33</sup>    |
| Structured BN | Porous BN powder                            | Spark plasma sintering                      | 430                                                   | 786                                      | <sup>34</sup>    |
| Structured BN | Boric acid-cured melamine resin             | 1000 °C (NH <sub>3</sub> )                  | 1530                                                  | 310                                      | <sup>35</sup>    |

<sup>a</sup> ρ = bulk density of shaped BN

**Table S3.** Summary of separation studies using porous BN as adsorbent, showing the type of separations (split into liquid/vapor and gas phase), example of species involved, adsorption conditions (initial concentration of pollutant ( $C_0$ )), quantity adsorbed (maximum adsorbed amount ( $q_{\max}$ )), and sorption mechanisms suggested (related to Table 3).

| Separation in liquid/vapor phase | Example species                    | $C_0$ range studied (mg L <sup>-1</sup> ) |         | $q_{\max}$ range (mg g <sup>-1</sup> )                    | Sorption mechanisms suggested                                                                                                                                                                          | Ref.  |
|----------------------------------|------------------------------------|-------------------------------------------|---------|-----------------------------------------------------------|--------------------------------------------------------------------------------------------------------------------------------------------------------------------------------------------------------|-------|
|                                  |                                    | T (°C)                                    | P (bar) |                                                           |                                                                                                                                                                                                        |       |
| Trace metal removal from water   | Cu <sup>2+</sup>                   | 200 - 1870                                |         | 200 - 819                                                 | Mainly ion-exchange interactions dominated by electrostatic and surface complexation. Hydrogen bonding and physisorption also reported. Increased adsorption in the presence of defects and higher SSA | 36,37 |
|                                  | Pb <sup>2+</sup>                   | 6 - 200                                   |         | 204 - 845                                                 |                                                                                                                                                                                                        |       |
|                                  | Cr <sup>3+</sup>                   | 52 - 100                                  |         | 120 - 387                                                 |                                                                                                                                                                                                        |       |
|                                  | Ce <sup>3+</sup>                   | 52                                        |         | 282                                                       |                                                                                                                                                                                                        |       |
|                                  | Ni <sup>2+</sup>                   | 52 - 700                                  |         | 95 - 235                                                  |                                                                                                                                                                                                        |       |
|                                  | Co <sup>2+</sup>                   | 52                                        |         | 215                                                       |                                                                                                                                                                                                        |       |
|                                  | Cd <sup>2+</sup>                   | 200 - 600                                 |         | 107- 561                                                  |                                                                                                                                                                                                        |       |
| As <sup>5+</sup>                 | 1 - 50                             |                                           | 5 - 32  |                                                           |                                                                                                                                                                                                        |       |
| Removal of dyes from water       | Methylene blue                     | 10 - 350                                  |         | 107 - 13973                                               | Mainly $\pi$ - $\pi$ stacking interactions. Electrostatic interactions, physisorption                                                                                                                  | 36-38 |
|                                  | Methyl Orange                      | 40                                        |         | 298 - 395                                                 |                                                                                                                                                                                                        |       |
|                                  | Rhodamine B                        | 3 - 100                                   |         | 76 - 992                                                  |                                                                                                                                                                                                        |       |
|                                  | Basic Yellow                       | 90                                        |         | 424                                                       |                                                                                                                                                                                                        |       |
|                                  | Congo Red                          | 50 - 130                                  |         | 307 - 782                                                 |                                                                                                                                                                                                        |       |
| PFAS from water                  | PFOS                               | 200                                       |         | ~57                                                       | Electrostatic interactions                                                                                                                                                                             | 39    |
|                                  | PFDA                               | 50                                        |         | ~90                                                       |                                                                                                                                                                                                        |       |
| Oils and organic solvents        | Engine oil                         | --                                        |         | 18000 - 56800                                             | Capillarity effect, pore filling, SSA                                                                                                                                                                  | 40-42 |
|                                  | Ethanol                            | --                                        |         | 14000 - 25000                                             |                                                                                                                                                                                                        |       |
|                                  | Acetone                            | --                                        |         | 25000                                                     |                                                                                                                                                                                                        |       |
|                                  | Toluene                            | --                                        |         | 16000 - 32000                                             |                                                                                                                                                                                                        |       |
|                                  | Toluene/n-heptane/methanol         | --                                        |         | ~600                                                      |                                                                                                                                                                                                        |       |
|                                  | Cyclohexane                        | --                                        |         | 5000                                                      |                                                                                                                                                                                                        |       |
| Removal of bio waste from water  | Tetracyclines                      | 20 - 300                                  |         | 118 - 1100                                                | $\pi$ - $\pi$ stacking interactions, electrostatic interactions, van der Waals forces                                                                                                                  | 36-38 |
|                                  | Levofloxacin                       | 20 - 300                                  |         | 318                                                       |                                                                                                                                                                                                        |       |
|                                  | Sulfamethazine                     | 20 - 300                                  |         | 19                                                        |                                                                                                                                                                                                        |       |
| Desulfurization of oil           | Dibenzothiophene (DBT) in n-octane | 500 - 800                                 |         | 35 - 65 mgS g <sup>-1</sup>                               | Lewis acid-base interactions                                                                                                                                                                           | 43,44 |
| Iodine removal                   | Iodine vapor                       | --                                        |         | 2120                                                      | Physisorption, Lewis acid-base interactions                                                                                                                                                            | 45    |
|                                  | Iodine/ n-hexane                   | 50                                        |         | 61                                                        |                                                                                                                                                                                                        |       |
| Separation in gas phase          | Species involved                   | Conditions                                |         | $q_{\max}$ range (mmol g <sup>-1</sup> )                  | Sorption mechanisms suggested                                                                                                                                                                          | Ref.  |
|                                  |                                    | T (°C)                                    | P (bar) |                                                           |                                                                                                                                                                                                        |       |
| Pre-combustion carbon capture    | CO <sub>2</sub> /H <sub>2</sub>    | 25                                        | 20      | CO <sub>2</sub> : ~8                                      | Physisorption. Pore characteristics and electrostatic interactions key at low pressure. At high pressure volume and SSA play key role                                                                  | 2,46  |
|                                  |                                    | 25                                        | 40      | CO <sub>2</sub> : ~19                                     |                                                                                                                                                                                                        |       |
| Post-combustion carbon capture   | CO <sub>2</sub> /N <sub>2</sub>    | 25                                        | 1       | CO <sub>2</sub> : 1.6 – 4.6<br>N <sub>2</sub> : 0.2 – 0.3 |                                                                                                                                                                                                        |       |

|                               |                                                                                                                                                                     |    |    |                                                                                                                                                                                                           |                                                                       |         |
|-------------------------------|---------------------------------------------------------------------------------------------------------------------------------------------------------------------|----|----|-----------------------------------------------------------------------------------------------------------------------------------------------------------------------------------------------------------|-----------------------------------------------------------------------|---------|
| Natural gas sweetening        | CO <sub>2</sub> /CH <sub>4</sub>                                                                                                                                    | 25 | 1  | CO <sub>2</sub> : 1.6 – 3.9<br>CH <sub>4</sub> : 0.6 – 0.7<br>CH <sub>4</sub> : ~9.0                                                                                                                      | Physisorption. Electrostatic interactions affect less CH <sub>4</sub> | 2,46,47 |
|                               |                                                                                                                                                                     | 25 | 70 |                                                                                                                                                                                                           |                                                                       |         |
| Formaldehyde from air         | HCHO                                                                                                                                                                | 25 | 1  | 0.63<br>(20 ppm C <sub>0</sub> )                                                                                                                                                                          | Physisorption, hydrogen bonding, $\pi$ - $\pi$ conjugation            | 48      |
| Light hydrocarbons separation | N <sub>2</sub> , CH <sub>4</sub> , C <sub>2</sub> H <sub>4</sub> ,<br>C <sub>2</sub> H <sub>6</sub> , C <sub>3</sub> H <sub>6</sub> , C <sub>3</sub> H <sub>8</sub> | 25 | 1  | N <sub>2</sub> : 0.1<br>CH <sub>4</sub> : 0.5<br>C <sub>2</sub> H <sub>4</sub> : 2.1 C <sub>2</sub> H <sub>6</sub> :<br>3.0<br>C <sub>3</sub> H <sub>6</sub> : 4.5<br>C <sub>3</sub> H <sub>8</sub> : 5.5 | Pure physisorption (dispersion forces)                                | 49      |
| Ammonia                       | NH <sub>3</sub>                                                                                                                                                     | 25 | 1  | NH <sub>3</sub> : 5.3 CO <sub>2</sub> :<br>0.9                                                                                                                                                            | Physisorption, Lewis acid-base interactions and H-bonding             | 50      |

**Table S4.** Summary of gas storage studies using porous BN as adsorbent, showing the surface area of the material, and the performance metrics at given conditions (related to Table 4).

| Gas stored      | SSA <sub>BET</sub><br>(m <sup>2</sup> g <sup>-1</sup> ) | T<br>(°C)       | P<br>(MPa) | Gas uptake<br>(wt%) | Desorption level<br>(%) <sup>a</sup> | Ref   |
|-----------------|---------------------------------------------------------|-----------------|------------|---------------------|--------------------------------------|-------|
| H <sub>2</sub>  | 150                                                     | RT <sup>b</sup> | 10         | 1.8                 | 30                                   | 51,52 |
|                 | 210                                                     | RT              | 10         | 2.6                 | 30                                   | 51,52 |
|                 | 260                                                     | RT              | 10         | 2.9                 | 20                                   | 52    |
|                 | 790                                                     | RT              | 10         | 4.2                 | 50                                   | 53    |
|                 | 1560                                                    | -196            | 0.1        | 1.07                | N/A                                  | 54    |
|                 | 215                                                     | 25              | 10         | 4.07                | N/A                                  | 55    |
|                 | 1150                                                    | -196            | 1          | 2.3                 | 100                                  | 56    |
|                 | 1690                                                    | 25              | 3          | 5.6                 | 84                                   | 57    |
|                 | 1040-1070                                               | -196            | 0.1        | 1.41-1.6            | N/A                                  | 58    |
|                 |                                                         |                 | 1          | 1.9-2.14            | N/A                                  |       |
|                 | 1900                                                    | -196            | 1          | 2.6                 | 100                                  | 59    |
|                 | 540                                                     | RT              | 5          | 5.7                 | 89                                   | 60    |
|                 | 400-1290                                                | -196            | 0.1        | 0.98-1.35           | N/A                                  | 61    |
| 1               |                                                         |                 | 1.65-2.33  | 100                 |                                      |       |
| CH <sub>4</sub> | 440-720                                                 | 0               | 0.1        | 0-3                 | N/A                                  | 62    |
|                 | 1050                                                    | 0               | 0.1        | 1.1                 | N/A                                  | 47    |
|                 | 1500                                                    | 25              | 7          | 13.6                | N/A                                  | 35    |

<sup>a</sup>Percentage of gas released when the pressure is reduced to ambient condition; <sup>b</sup>RT stands for room temperature.

**Table S5.** Summary of catalysis studies using porous BN as a catalyst, showing the type of catalysis (i.e., heterogenous catalysis, photocatalysis or electrocatalysis), the targeted reaction and some of the key performance indicators (related to Table 5).

| <b>Heterogeneous catalysis</b>                   |                                |                                                         |                        |                                                         |                                                                                                         |             |
|--------------------------------------------------|--------------------------------|---------------------------------------------------------|------------------------|---------------------------------------------------------|---------------------------------------------------------------------------------------------------------|-------------|
| <b>Reaction studied</b>                          | <b>Reaction conditions</b>     | <b>Feed ratio/reactant mixture</b>                      | <b>Conversion rate</b> | <b>Selectivity rate</b>                                 | <b>Catalyst stability</b>                                                                               | <b>Ref.</b> |
| Oxidative dehydrogenation of propane             | T = 490 °C                     | 2:1:3.67<br>propane:O <sub>2</sub> :N <sub>2</sub>      | 14.0% propane          | 79% propylene                                           | Min 32 h                                                                                                | 63          |
| Oxidative dehydrogenation of n-butane, isobutane | T = 460 °C                     | 1:1:8<br>alkane:O <sub>2</sub> :N <sub>2</sub>          | 7.2% n-butane          | 76.2% butene                                            | -                                                                                                       | 64          |
|                                                  |                                |                                                         | 6.2% isobutane         | 75.4% butene                                            | -                                                                                                       |             |
| Methane oxidation                                | T = 690 °C                     | 2:1:4<br>methane:O <sub>2</sub> :N <sub>2</sub>         | 20.5% methane          | 76% CO                                                  | Min 20 h                                                                                                | 65          |
|                                                  | T = 720 °C                     |                                                         | 37.0% methane          | 81.4% CO                                                | -                                                                                                       |             |
| Styrene epoxidation                              | T = 80 °C                      | 26.5 mmol TBHP<br>25 mL acetonitrile<br>10 mmol styrene | 17.7-23.9% styrene     | 76.2-88.0% styrene oxide                                | Min 9 h                                                                                                 | 66          |
| Aerobic oxidative desulfurization                | T = 150 °C<br>ambient pressure | 40 mL oil<br>(500 ppm DBT)                              | -                      | 84.8-98.8% DBT removal                                  | Min 10 recycling cycles                                                                                 | 67          |
| Acetylene hydrochlorination                      | T = 200 °C                     | 1:1<br>HCl:acetylene                                    | 72% acetylene          | > 96% vinyl chloride                                    | -                                                                                                       | 68          |
| Acetylene hydrochlorination                      | T = 280 °C                     | 1:2<br>HCl:acetylene                                    | >99% acetylene         | > 99% vinyl chloride                                    | Min 1000 h                                                                                              |             |
| <b>Photocatalysis</b>                            |                                |                                                         |                        |                                                         |                                                                                                         |             |
| <b>Reaction</b>                                  | <b>Reaction phase</b>          | <b>Irradiation range</b>                                | <b>Light source</b>    | <b>Sacrificial agent</b>                                | <b>Production rate</b>                                                                                  | <b>Ref.</b> |
| H <sub>2</sub> generation                        | Liquid                         | 200-2500 nm                                             | 300 W Xe arc lamp      | TEOA                                                    | 47.1 μmol H <sub>2</sub> g <sup>-1</sup> h <sup>-1</sup>                                                | 69          |
| H <sub>2</sub> generation                        | Liquid                         | Specified as UV-Vis<br>(300-800 nm)<br>> 420 nm         | 300 W Xe lamp          | TEA                                                     | ~45.0 μmol H <sub>2</sub> h <sup>-1</sup>                                                               | 1           |
|                                                  |                                |                                                         |                        | TEA                                                     | 3.6 μmol H <sub>2</sub> h <sup>-1</sup>                                                                 |             |
| CO <sub>2</sub> photoreduction                   | Gas                            | > 420 nm                                                |                        | H <sub>2</sub> O                                        | 4.7 μmol CO h <sup>-1</sup><br>1.5 μmol H <sub>2</sub> h <sup>-1</sup>                                  |             |
| CO <sub>2</sub> photoreduction                   | Gas                            | > 325 nm                                                | 300 W Xe arc lamp      | H <sub>2</sub>                                          | 1.2 μmol CO g <sup>-1</sup> h <sup>-1</sup>                                                             | 70          |
|                                                  |                                | > 400 nm                                                |                        |                                                         | 0.2 μmol CO g <sup>-1</sup> h <sup>-1</sup>                                                             |             |
| CO <sub>2</sub> photoreduction                   | Gas                            | Specified as UV-vis                                     | 300 W Xe lamp          | H <sub>2</sub> O                                        | 12.5 μmol CO g <sup>-1</sup> h <sup>-1</sup><br>3.3 μmol H <sub>2</sub> g <sup>-1</sup> h <sup>-1</sup> | 71          |
| <b>Electrocatalysis</b>                          |                                |                                                         |                        |                                                         |                                                                                                         |             |
| <b>Reaction</b>                                  | <b>Catalyst</b>                | <b>Formation rate</b>                                   | <b>Solution</b>        | <b>Faradic efficiency/<br/>Electron transfer number</b> | <b>Time/<br/>Durability</b>                                                                             | <b>Ref.</b> |



|                                            |                                          |                                                                            |                                       |                        |                        |               |
|--------------------------------------------|------------------------------------------|----------------------------------------------------------------------------|---------------------------------------|------------------------|------------------------|---------------|
| N <sub>2</sub> fixation to NH <sub>3</sub> | h-BNNS                                   | 22.4 μg NH <sub>3</sub> h <sup>-1</sup><br>mg <sub>cat</sub> <sup>-1</sup> | 0.1 M HCl                             | 4.7% @-0.75V<br>vs RHE | 2 h                    | <sup>72</sup> |
| N <sub>2</sub> fixation to NH <sub>3</sub> | Porous BN                                | 18.2 μg NH <sub>3</sub> h <sup>-1</sup><br>mg <sub>cat</sub> <sup>-1</sup> | 0.1 M Na <sub>2</sub> SO <sub>4</sub> | 5.5% @-0.70V<br>vs RHE | 2 h                    | <sup>73</sup> |
| Oxygen reduction<br>reaction               | Pt/porous BN                             | < 0.6% H <sub>2</sub> O <sub>2</sub>                                       | 0.1 M HClO <sub>4</sub>               | >3.99 electrons        | 10 <sup>4</sup> cycles | <sup>74</sup> |
| Oxygen reduction<br>reaction               | BNNT<br>BNNS<br>sputter-<br>deposited BN | -                                                                          | 0.5 M H <sub>2</sub> SO <sub>2</sub>  | -                      | -                      | <sup>75</sup> |

## References

- (1) Huang, C.; Chen, C.; Zhang, M.; Lin, L.; Ye, X.; Lin, S.; Antonietti, M.; Wang, X. Carbon-Doped BN Nanosheets for Metal-Free Photoredox Catalysis. *Nat. Commun.* **2015**, *6*. <https://doi.org/10.1038/ncomms8698>.
- (2) Chen, S.; Li, P.; Xu, S.; Pan, X.; Fu, Q.; Bao, X. Carbon Doping of Hexagonal Boron Nitride Porous Materials toward CO<sub>2</sub> Capture. *J. Mater. Chem. A* **2018**, *6* (4), 1832–1839. <https://doi.org/10.1039/C7TA08515J>.
- (3) Chen, L.; Zhou, M.; Luo, Z.; Wakeel, M.; Asiri, A. M.; Wang, X. Template-Free Synthesis of Carbon-Doped Boron Nitride Nanosheets for Enhanced Photocatalytic Hydrogen Evolution. *Appl. Catal. B Environ.* **2019**, *241*, 246–255. <https://doi.org/https://doi.org/10.1016/j.apcatb.2018.09.034>.
- (4) Fang, Y.; Merenkov, I. S.; Li, X.; Xu, J.; Lin, S.; Kosinova, M. L.; Wang, X. Vertically Aligned 2D Carbon Doped Boron Nitride Nanofilms for Photoelectrochemical Water Oxidation. *J. Mater. Chem. A* **2020**, *8* (26), 13059–13064. <https://doi.org/10.1039/D0TA04593D>.
- (5) Li, H.; Zhu, S.; Zhang, M.; Wu, P.; Pang, J.; Zhu, W.; Jiang, W.; Li, H. Tuning the Chemical Hardness of Boron Nitride Nanosheets by Doping Carbon for Enhanced Adsorption Capacity. *ACS Omega* **2017**, *2* (9), 5385–5394. <https://doi.org/10.1021/acsomega.7b00795>.
- (6) Weng, Q.; Kvashnin, D. G.; Wang, X.; Cretu, O.; Yang, Y.; Zhou, M.; Zhang, C.; Tang, D.-M.; Sorokin, P. B.; Bando, Y.; Golberg, D. Tuning of the Optical, Electronic, and Magnetic Properties of Boron Nitride Nanosheets with Oxygen Doping and Functionalization. *Adv. Mater.* **2017**, *29* (28), 1700695. <https://doi.org/https://doi.org/10.1002/adma.201700695>.
- (7) Lu, Q.; Zhao, Q.; Yang, T.; Zhai, C.; Wang, D.; Zhang, M. Preparation of Boron Nitride Nanoparticles with Oxygen Doping and a Study of Their Room-Temperature Ferromagnetism. *ACS Appl. Mater. Interfaces* **2018**, *10* (15), 12947–12953. <https://doi.org/10.1021/acsami.7b17932>.
- (8) Sevak Singh, R.; Yingjie Tay, R.; Leong Chow, W.; Hon Tsang, S.; Mallick, G.; Tong Teo, E. H. Band Gap Effects of Hexagonal Boron Nitride Using Oxygen Plasma. *Appl. Phys. Lett.* **2014**, *104* (16), 163101. <https://doi.org/10.1063/1.4872318>.
- (9) Liu, H.; Li, P.; Wang, Y.; Wang, H.; Fang, Y.; Guo, Z.; Huang, Y.; Lin, J.; Hu, L.; Tang, C.; Liu, Z. Eco-Green C, O Co-Doped Porous BN Adsorbent for Aqueous Solution with Superior Adsorption Efficiency and Selectivity. *Chemosphere* **2022**, *288*, 132520. <https://doi.org/https://doi.org/10.1016/j.chemosphere.2021.132520>.
- (10) Fan, Y.; Wang, Y.; Lou, J.; Xu, S.; Zhang, L.; An, L.; Heinrich, H. Formation of Silicon-Doped Boron Nitride Bamboo Structures Via Pyrolysis of a Polymeric Precursor. *J. Am. Ceram. Soc.* **2006**, *89* (2), 740–742. <https://doi.org/https://doi.org/10.1111/j.1551-2916.2005.00761.x>.
- (11) Cho, Y. J.; Kim, C. H.; Kim, H. S.; Park, J.; Choi, H. C.; Shin, H.-J.; Gao, G.; Kang, H. S. Electronic Structure of Si-Doped BN Nanotubes Using X-Ray Photoelectron Spectroscopy and First-Principles Calculation. *Chem. Mater.* **2009**, *21* (1), 136–143. <https://doi.org/10.1021/cm802559m>.
- (12) Li, Y.; Li, H.; Li, R.; Su, X.; Shen, S. Preparation of Phosphorus-Doped Boron Nitride and Its Adsorption of Heavy Metals from Flue Gas. *R. Soc. Open Sci.* **2022**, *7* (8), 200079. <https://doi.org/10.1098/rsos.200079>.
- (13) Liu, B.; Lee, J. Y.; Yan, S. Enhanced Catalytic Oxidation of CO on Sulfur-Doped Boron Nitride. *ChemNanoMat* **2020**, *6* (2), 223–231. <https://doi.org/https://doi.org/10.1002/cnma.201900516>.
- (14) Sugino, T.; Tanioka, K.; Kawasaki, S.; Shirafuji, J. Characterization and Field Emission of Sulfur-

- Doped Boron Nitride Synthesized by Plasma-Assisted Chemical Vapor Deposition. *Jpn. J. Appl. Phys.* **1997**, 36 (Part 2, No. 4B), L463–L466. <https://doi.org/10.1143/jjap.36.1463>.
- (15) Liu, Y.; Li, L.; Li, Q.; Lin, J.; Guo, Z.; Zhang, X.; Lu, Z.; Ma, Y.; Huang, Y.; Tang, C. Fluorine Doped Porous Boron Nitride for Efficient CO<sub>2</sub> Capture and Separation: A DFT Study. *Appl. Surf. Sci.* **2021**, 556, 149775. <https://doi.org/https://doi.org/10.1016/j.apsusc.2021.149775>.
- (16) Asif, Q. U. A.; Hussain, A.; Nabi, A.; Tayyab, M.; Rafique, H. M. Computational Study of X-Doped Hexagonal Boron Nitride (h-BN): Structural and Electronic Properties (X = P, S, O, F, Cl). *J. Mol. Model.* **2021**, 27 (2), 31. <https://doi.org/10.1007/s00894-020-04659-z>.
- (17) Li, L.; Hu, C.; Zhang, L.; Yu, G.; Lyu, L.; Li, F.; Jiang, N. Framework Cu-Doped Boron Nitride Nanobelts with Enhanced Internal Electric Field for Effective Fenton-like Removal of Organic Pollutants. *J. Mater. Chem. A* **2019**, 7 (12), 6946–6956. <https://doi.org/10.1039/C9TA00255C>.
- (18) Cui, Q.; Qin, G.; Wang, W.; Sun, L.; Du, A.; Sun, Q. Mo-Doped Boron Nitride Monolayer as a Promising Single-Atom Electrocatalyst for CO(2) Conversion. *Beilstein J. Nanotechnol.* **2019**, 10, 540–548. <https://doi.org/10.3762/bjnano.10.55>.
- (19) Zhou, Y. G.; Yang, P.; Sun, X.; Wang, Z. G.; Zu, X. T.; Gao, F. First-Principles Study of the Noble Metal-Doped BN Layer. *J. Appl. Phys.* **2011**, 109 (8), 84308. <https://doi.org/10.1063/1.3569725>.
- (20) Liang, C.; Zhang, Y.; Zhang, B.; Liu, X.-M.; Gao, G.-L.; Cao, J.; Xu, P. Plasmonic Heating-Promoted Photothermal Synthesis of  $\alpha$ -Cyanoacrylonitriles Over Au/h-BN Catalysts. *Front. Chem.* **2021**, 9, 732162. <https://doi.org/10.3389/fchem.2021.732162>
- (21) Rousseas, M.; Goldstein, A. P.; Mickelson, W.; Worsley, M. A.; Woo, L.; Zettl, A. Synthesis of Highly Crystalline Sp<sup>2</sup>-Bonded Boron Nitride Aerogels. *ACS Nano* **2013**, 7 (10), 8540–8546. <https://doi.org/10.1021/nn402452p>.
- (22) Pham, T.; Goldstein, A. P.; Lewicki, J. P.; Kucheyev, S. O.; Wang, C.; Russell, T. P.; Worsley, M. A.; Woo, L.; Mickelson, W.; Zettl, A. Nanoscale Structure and Superhydrophobicity of Sp<sup>2</sup>-Bonded Boron Nitride Aerogels. *Nanoscale* **2015**, 7 (23), 10449–10458. <https://doi.org/10.1039/c5nr01672j>.
- (23) Song, Y.; Li, B.; Yang, S.; Ding, G.; Zhang, C.; Xie, X. Ultralight Boron Nitride Aerogels via Template-Assisted Chemical Vapor Deposition. *Sci. Rep.* **2015**, 5, 1–9. <https://doi.org/10.1038/srep10337>.
- (24) Xu, X.; Zhang, Q.; Hao, M.; Hu, Y.; Lin, Z.; Peng, L.; Wang, T.; Ren, X.; Wang, C.; Zhao, Z.; Wan, C.; Fei, H.; Wang, L.; Zhu, J.; Sun, H.; Chen, W.; Du, T.; Deng, B.; Cheng, G. J.; Shakir, I.; Dames, C.; Fisher, T. S.; Zhang, X.; Li, H.; Huang, Y.; Duan, X. Double-Negative-Index Ceramic Aerogels for Thermal Superinsulation. *Science* **2019**, 363 (6428), 723–727. <https://doi.org/10.1126/science.aav7304>.
- (25) Kutty, R. G.; Sreejith, S.; Kong, X.; He, H.; Wang, H.; Lin, J.; Suenaga, K.; Lim, C. T.; Zhao, Y.; Ji, W.; Liu, Z. A Topologically Substituted Boron Nitride Hybrid Aerogel for Highly Selective CO<sub>2</sub> Uptake. *Nano Res.* **2018**, 11 (12), 6325–6335. <https://doi.org/10.1007/s12274-018-2156-z>.
- (26) Xue, Y.; Dai, P.; Zhou, M.; Wang, X.; Pakdel, A.; Zhang, C.; Weng, Q.; Takei, T.; Fu, X.; Popov, Z. I.; Sorokin, P. B.; Tang, C.; Shimamura, K.; Bando, Y.; Golberg, D. Multifunctional Superelastic Foam-Like Boron Nitride Nanotubular Cellular-Network Architectures. *ACS Nano* **2017**, 11 (1), 558–568. <https://doi.org/10.1021/acsnano.6b06601>.
- (27) Xue, Y.; Dai, P.; Jiang, X.; Wang, X.; Zhang, C.; Tang, D.; Weng, Q.; Wang, X.; Pakdel, A.; Tang, C.; Bando, Y.; Golberg, D. Template-Free Synthesis of Boron Nitride Foam-like Porous Monoliths and Their High-End Applications in Water Purification. *J. Mater. Chem. A* **2015**, 4 (4), 1469–1478.

<https://doi.org/10.1039/c5ta08134c>.

- (28) Lin, J.; Yuan, X.; Li, G.; Huang, Y.; Wang, W.; He, X.; Yu, C.; Fang, Y.; Liu, Z.; Tang, C. Self-Assembly of Porous Boron Nitride Microfibers into Ultralight Multifunctional Foams of Large Sizes. *ACS Appl. Mater. Interfaces* **2017**, *9* (51), 44732–44739. <https://doi.org/10.1021/acsami.7b16198>.
- (29) Li, G.; Zhu, M.; Gong, W.; Du, R.; Eychmüller, A.; Li, T.; Lv, W.; Zhang, X. Boron Nitride Aerogels with Super-Flexibility Ranging from Liquid Nitrogen Temperature to 1000 °C. *Adv. Funct. Mater.* **2019**, *29* (20), 1–7. <https://doi.org/10.1002/adfm.201900188>.
- (30) Wang, B.; Li, G.; Xu, L.; Liao, J.; Zhang, X. Nanoporous Boron Nitride Aerogel Film and Its Smart Composite with Phase Change Materials. *ACS Nano* **2020**, *14* (12), 16590–16599. <https://doi.org/10.1021/acsnano.0c05931>.
- (31) Cao, C.; Yang, J.; Fu, K.; Zhai, Q.; Zhou, Z.; Ji, J.; Ma, Y.; Zhou, M.; Xue, Y.; Tang, C. Hierarchically Porous Boron Nitride Foams for Multifunctional Bulk Adsorbents. *Chem. Eng. J.* **2021**, *422*, 129896. <https://doi.org/10.1016/j.cej.2021.129896>.
- (32) Zeng, X.; Ye, L.; Yu, S.; Sun, R.; Xu, J.; Wong, C. P. Facile Preparation of Superelastic and Ultralow Dielectric Boron Nitride Nanosheet Aerogels via Freeze-Casting Process. *Chem. Mater.* **2015**, *27* (17), 5849–5855. <https://doi.org/10.1021/acs.chemmater.5b00505>.
- (33) Lei, W.; Mochalin, V. N.; Liu, D.; Qin, S.; Gogotsi, Y.; Chen, Y. Boron Nitride Colloidal Solutions, Ultralight Aerogels and Freestanding Membranes through One-Step Exfoliation and Functionalization. *Nat. Commun.* **2015**, *6*, 1–8. <https://doi.org/10.1038/ncomms9849>.
- (34) Bernard, S.; Miele, P. Ordered Mesoporous Polymer-Derived Ceramics and Their Processing into Hierarchically Porous Boron Nitride and Silicoboron Carbonitride Monoliths. *New J. Chem.* **2014**, *38* (5), 1923–1931. <https://doi.org/10.1039/c3nj01612a>.
- (35) Tian, T.; Hou, J.; Ansari, H.; Xiong, Y.; L’Hermitte, A.; Danaci, D.; Pini, R.; Petit, C. Mechanically Stable Structured Porous Boron Nitride with High Volumetric Adsorption Capacity. *J. Mater. Chem. A* **2021**, *9* (22), 13366–13373. <https://doi.org/10.1039/d1ta02001c>.
- (36) Ihsanullah, I. Boron Nitride-Based Materials for Water Purification: Progress and Outlook. *Chemosphere* **2021**, *263*, 127970. <https://doi.org/https://doi.org/10.1016/j.chemosphere.2020.127970>.
- (37) Yu, S.; Wang, X.; Pang, H.; Zhang, R.; Song, W.; ... D. F.-C. E.; 2018, undefined. Boron Nitride-Based Materials for the Removal of Pollutants from Aqueous Solutions: A Review. *Elsevier*.
- (38) Chao, Y.; Tang, B.; Luo, J.; Wu, P.; Tao, D.; Chang, H.; Chu, X.; Huang, Y.; Li, H.; Zhu, W. Hierarchical Porous Boron Nitride with Boron Vacancies for Improved Adsorption Performance to Antibiotics. *J. Colloid Interface Sci.* **2021**, *584*, 154–163. <https://doi.org/10.1016/j.jcis.2020.09.075>.
- (39) Feng, Y.; Zhou, Y.; Lee, P. H.; Shih, K. Mineralization of Perfluorooctanesulfonate (PFOS) and Perfluorodecanoate (PFDA) from Aqueous Solution by Porous Hexagonal Boron Nitride: Adsorption Followed by Simultaneous Thermal Decomposition and Regeneration. *RSC Adv.* **2016**, *6* (114), 113773–113780. <https://doi.org/10.1039/C6RA15564B>.
- (40) Gautam, C.; Tiwary, C.; Jose, S.; Brunetto, G.; ... S. O.-A.; 2015, undefined. Synthesis of Low-Density, Carbon-Doped, Porous Hexagonal Boron Nitride Solids. *ACS Publ.* **2015**, *15* (12), 24. <https://doi.org/10.1021/acsnano.5b05847>.
- (41) Marchesini, S.; Wang, X.; Petit, C. Porous Boron Nitride Materials: Influence of Structure,

- Chemistry and Stability on the Adsorption of Organics. *Front. Chem.* **2019**, *7*, 1–9. <https://doi.org/10.3389/fchem.2019.00160>.
- (42) Xue, Y.; Dai, P.; Zhou, M.; Wang, X.; Pakdel, A.; Zhang, C.; Weng, Q.; Takei, T.; Fu, X.; Popov, Z. I.; Sorokin, P. B.; Tang, C.; Shimamura, K.; Bando, Y.; Golberg, D. Multifunctional Superelastic Foam-Like Boron Nitride Nanotubular Cellular-Network Architectures. *ACS Nano* **2017**, *11* (1), 558–568. <https://doi.org/10.1021/acsnano.6b06601>.
- (43) Xiong, J.; Yang, L.; Chao, Y.; Pang, J.; Zhang, M.; Zhu, W.; Li, H. Boron Nitride Mesoporous Nanowires with Doped Oxygen Atoms for the Remarkable Adsorption Desulfurization Performance from Fuels. *ACS Sustain. Chem. Eng.* **2016**, *4* (8), 4457–4464. <https://doi.org/10.1021/ACSSUSCHEMENG.6B01156>.
- (44) Xiong, J.; Zhu, W.; Li, H.; Yang, L.; Chao, Y.; Wu, P.; Xun, S.; Jiang, W.; Zhang, M.; Li, H. Carbon-Doped Porous Boron Nitride: Metal-Free Adsorbents for Sulfur Removal from Fuels. *J. Mater. Chem. A* **2015**, *3* (24), 12738–12747. <https://doi.org/10.1039/C5TA01346A>.
- (45) Li, G.; Huang, Y.; Lin, J.; Yu, C.; Liu, Z.; Fang, Y.; Xue, Y. Efficient Capture and Reversible Storage of Iodine Using Foam-like Adsorbents Consisting of Porous Boron Nitride Micro Fibers. *Chem. Eng. J.* **2020**, *382*, 122833. <https://doi.org/10.1016/j.cej.2019.122833>.
- (46) Marchesini, S.; McGilvery, C. M.; Bailey, J.; Petit, C. Template-Free Synthesis of Highly Porous Boron Nitride: Insights into Pore Network Design and Impact on Gas Sorption. *ACS Nano* **2017**, *11* (10), 10003–10011. <https://doi.org/10.1021/acsnano.7b04219>.
- (47) Wang, D.; Xue, Y.; Wang, C.; Ji, J.; Zhou, Z.; Tang, C. Improved Capture of Carbon Dioxide and Methane via Adding Micropores within Porous Boron Nitride Fibers. *J. Mater. Sci.* **2019**, *54* (14), 10168–10178. <https://doi.org/10.1007/S10853-019-03617-2>.
- (48) Ye, J.; Zhu, X.; Cheng, B.; Yu, J.; Jiang, C. Few-Layered Graphene-like Boron Nitride: A Highly Efficient Adsorbent for Indoor Formaldehyde Removal. *Environ. Sci. Technol. Lett.* **2017**, *4* (1), 20–25. <https://doi.org/10.1021/acs.estlett.6b00426>.
- (49) Saha, D.; Orkoulas, G.; Yohannan, S.; Ho, H. C.; Cakmak, E.; Chen, J.; Ozcan, S. Nanoporous Boron Nitride as Exceptionally Thermally Stable Adsorbent: Role in Efficient Separation of Light Hydrocarbons. *ACS Appl. Mater. Interfaces* **2017**, *9* (16), 14506–14517. <https://doi.org/10.1021/ACSAMI.7B01889>.
- (50) Yang, C.; Wang, J.; Chen, Y.; Liu, D.; Huang, S.; Lei, W. One-Step Template-Free Synthesis of 3D Functionalized Flower-like Boron Nitride Nanosheets for NH<sub>3</sub> and CO<sub>2</sub> Adsorption. *Nanoscale* **2018**, *10* (23), 10979–10985. <https://doi.org/10.1039/C8NR02074D>.
- (51) Ma, R.; Bando, Y.; Zhu, H.; Sato, T.; Xu, C.; Wu, D. Hydrogen Uptake in Boron Nitride Nanotubes at Room Temperature. *J. Am. Chem. Soc.* **2002**, *124* (26), 7672–7673. <https://doi.org/10.1021/ja026030e>.
- (52) Ma, R.; Bando, Y.; Sato, T.; Golberg, D.; Zhu, H.; Xu, C.; Wu, D. Synthesis of Boron Nitride Nanofibers and Measurement of Their Hydrogen Uptake Capacity. *Appl. Phys. Lett.* **2002**, *81* (27), 5225–5227. <https://doi.org/10.1063/1.1534415>.
- (53) Tang, C.; Bando, Y.; Ding, X.; Qi, S.; Golberg, D. Catalyzed Collapse and Enhanced Hydrogen Storage of BN Nanotubes. *J. Am. Chem. Soc.* **2002**, *124* (49), 14550–14551. <https://doi.org/10.1021/ja028051e>.
- (54) Portehault, D.; Giordano, C.; Gervais, C.; Senkowska, I.; Kaskel, S.; Sanchez, C.; Antonietti, M. High-Surface-Area Nanoporous Boron Carbon Nitrides for Hydrogen Storage. *Adv. Funct. Mater.*

- 2010**, *20* (11), 1827–1833. <https://doi.org/10.1002/adfm.201000281>.
- (55) Lian, G.; Zhang, X.; Zhang, S.; Liu, D.; Cui, D.; Wang, Q. Controlled Fabrication of Ultrathin-Shell BN Hollow Spheres with Excellent Performance in Hydrogen Storage and Wastewater Treatment. *Energy Environ. Sci.* **2012**, *5* (5), 7072–7080. <https://doi.org/10.1039/c2ee03240f>.
- (56) Weng, Q.; Wang, X.; Zhi, C.; Bando, Y.; Golberg, D. Boron Nitride Porous Microbelts for Hydrogen Storage. *ACS Nano* **2013**, *7* (2), 1558–1565. <https://doi.org/10.1021/nm305320v>.
- (57) Li, J.; Lin, J.; Xu, X.; Zhang, X.; Xue, Y.; Mi, J.; Mo, Z.; Fan, Y.; Hu, L.; Yang, X.; Zhang, J.; Meng, F.; Yuan, S.; Tang, C. Porous Boron Nitride with a High Surface Area: Hydrogen Storage and Water Treatment. *Nanotechnology* **2013**, *24* (15). <https://doi.org/10.1088/0957-4484/24/15/155603>.
- (58) Weng, Q.; Wang, X.; Wang, X.; Liu, D.; Jiang, X.; Zhi, C.; Bando, Y.; Golberg, D. Preparation and Hydrogen Sorption Performances of BCNO Porous Microbelts with Ultra-Narrow and Tunable Pore Widths. *Chem. - An Asian J.* **2013**, *8* (12), 2936–2939. <https://doi.org/10.1002/asia.201300940>.
- (59) Weng, Q.; Wang, X.; Bando, Y.; Golberg, D. One-Step Template-Free Synthesis of Highly Porous Boron Nitride Microsponges for Hydrogen Storage. *Adv. Energy Mater.* **2014**, *4* (7). <https://doi.org/10.1002/aenm.201301525>.
- (60) Lei, W.; Zhang, H.; Wu, Y.; Zhang, B.; Liu, D.; Qin, S.; Liu, Z.; Liu, L.; Ma, Y.; Chen, Y. Oxygen-Doped Boron Nitride Nanosheets with Excellent Performance in Hydrogen Storage. *Nano Energy* **2014**, *6*, 219–224. <https://doi.org/10.1016/j.nanoen.2014.04.004>.
- (61) Weng, Q.; Zeng, L.; Chen, Z.; Han, Y.; Jiang, K.; Bando, Y.; Golberg, D. Hydrogen Storage in Carbon and Oxygen Co-Doped Porous Boron Nitrides. *Adv. Funct. Mater.* **2021**, *31* (4), 7–9. <https://doi.org/10.1002/adfm.202007381>.
- (62) Janik, J. F.; Ackerman, W. C.; Paine, R. T.; Hua, D.-W.; Maskara, A.; Smith, D. M. Boron Nitride as a Selective Gas Adsorbent. *Langmuir* **1994**, *10* (2), 514–518. <https://doi.org/10.1021/la00014a029>.
- (63) Grant, J. T.; Carrero, C. A.; Goetl, F.; Venegas, J.; Burt, S. P.; Specht, S. E.; McDermott, W. P.; Chieragato, A.; Hermans, I. Selective Oxidative Dehydrogenation of Propane to Propene Using Boron Nitride Catalysts. *Science*. **2016**, *354* (6319), 1570–1573. <https://doi.org/10.1126/science.aaf7885>.
- (64) Venegas, J. M.; Grant, J. T.; McDermott, W. P.; Burt, S. P.; Micka, J.; Carrero, C. A.; Hermans, I. Selective Oxidation of N-Butane and Isobutane Catalyzed by Boron Nitride. *ChemCatChem* **2017**, *9* (12), 2118–2127. <https://doi.org/https://doi.org/10.1002/cctc.201601686>.
- (65) Wang, Y.; Zhao, L.; Shi, L.; Sheng, J.; Zhang, W.; Cao, X.-M.; Hu, P.; Lu, A.-H. Methane Activation over a Boron Nitride Catalyst Driven by in Situ Formed Molecular Water. *Catal. Sci. Technol.* **2018**, *8* (8), 2051–2055. <https://doi.org/10.1039/C8CY00163D>.
- (66) Fu, H.; Huang, K.; Yang, G.; Cao, Y.; Wang, H.; Peng, F.; Cai, X.; Gao, H.; Liao, Y.; Yu, H. Understanding the Catalytic Sites in Porous Hexagonal Boron Nitride for the Epoxidation of Styrene. *ACS Catal.* **2021**, *11* (14), 8872–8880. <https://doi.org/10.1021/acscatal.1c02171>.
- (67) Wu, P.; Zhu, W.; Chao, Y.; Zhang, J.; Zhang, P.; Zhu, H.; Li, C.; Chen, Z.; Li, H.; Dai, S. A Template-Free Solvent-Mediated Synthesis of High Surface Area Boron Nitride Nanosheets for Aerobic Oxidative Desulfurization. *Chem. Commun.* **2016**, *52* (1), 144–147. <https://doi.org/10.1039/C5CC07830J>.

- (68) Li, P.; Li, H.; Pan, X.; Tie, K.; Cui, T.; Ding, M.; Bao, X. Catalytically Active Boron Nitride in Acetylene Hydrochlorination. *ACS Catal.* **2017**, *7* (12), 8572–8577. <https://doi.org/10.1021/acscatal.7b01877>.
- (69) Liu, Q.; Chen, C.; Du, M.; Wu, Y.; Ren, C.; Ding, K.; Song, M.; Huang, C. Porous Hexagonal Boron Nitride Sheets: Effect of Hydroxyl and Secondary Amino Groups on Photocatalytic Hydrogen Evolution. *ACS Appl. Nano Mater.* **2018**, *1* (9), 4566–4575. <https://doi.org/10.1021/acsanm.8b00867>.
- (70) Shankar, R.; Sachs, M.; Francàs, L.; Lubert-Perquel, D.; Kerherve, G.; Regoutz, A.; Petit, C. Porous Boron Nitride for Combined CO<sub>2</sub> Capture and Photoreduction. *J. Mater. Chem. A* **2019**, *7* (41), 23931–23940. <https://doi.org/10.1039/c9ta02793a>.
- (71) Cao, Y.; Zhang, R.; Zhou, T.; Jin, S.; Huang, J.; Ye, L.; Huang, Z.; Wang, F.; Zhou, Y. B–O Bonds in Ultrathin Boron Nitride Nanosheets to Promote Photocatalytic Carbon Dioxide Conversion. *ACS Appl. Mater. Interfaces* **2020**, *12* (8), 9935–9943. <https://doi.org/10.1021/acscami.9b21157>.
- (72) Zhang, Y.; Du, H.; Ma, Y.; Ji, L.; Guo, H.; Tian, Z.; Chen, H.; Huang, H.; Cui, G.; Asiri, A. M.; Qu, F.; Chen, L.; Sun, X. Hexagonal Boron Nitride Nanosheet for Effective Ambient N<sub>2</sub> Fixation to NH<sub>3</sub>. *Nano Res.* **2019**, *12* (4), 919–924. <https://doi.org/10.1007/s12274-019-2323-x>.
- (73) Zhao, J.; Ren, X.; Li, X.; Fan, D.; Sun, X.; Ma, H.; Wei, Q.; Wu, D. High-Performance N<sub>2</sub>-to-NH<sub>3</sub> Fixation by a Metal-Free Electrocatalyst. *Nanoscale* **2019**, *11* (10), 4231–4235. <https://doi.org/10.1039/C8NR10401H>.
- (74) Li, Q.; Li, L.; Yu, X.; Wu, X.; Xie, Z.; Wang, X.; Lu, Z.; Zhang, X.; Huang, Y.; Yang, X. Ultrafine Platinum Particles Anchored on Porous Boron Nitride Enabling Excellent Stability and Activity for Oxygen Reduction Reaction. *Chem. Eng. J.* **2020**, *399*, 125827. <https://doi.org/10.1016/j.cej.2020.125827>.
- (75) Elumalai, G.; Noguchi, H.; Uosaki, K. Electrocatalytic Activity of Various Types of H–BN for the Oxygen Reduction Reaction. *Phys. Chem. Chem. Phys.* **2014**, *16* (27), 13755–13761. <https://doi.org/10.1039/c4cp00402g>.
